# Supplementary material for: Improving classification of mature microRNA by solving class imbalance problem
Source: PubMed Central journal article supplement (PMC4867574; doi:10.1038/srep25941), 2016-05-16
Supplement: srep25941-s1.pdf [file srep25941-s1.pdf]

## Supplementary Information

### Improving classification of mature microRNA by solving class imbalance problem

Ying Wang<sup>1,2</sup>, Xiaoye Li<sup>1</sup>, Bairui Tao<sup>1</sup>

<sup>1</sup>Modern Educational Technology Center, Qiqihar University, No.42, Wenhua Street, Qiqihar, Heilongjiang, China, 161006

<sup>2</sup>Institute of Biomedical Engineering, College of Automation, Harbin Engineering University, 145 Nantong Street, Nangang District, Harbin, Heilongjiang, China, 150001

\* Correspondence to: Ying Wang      Email: wangying0129@126.com

Modern Educational Technology Center, Qiqihar University, No.42, Wenhua Street, Qiqihar, Heilongjiang, China, 161006

Tel number: 08604522738151

Fax number: 08604522738151

**Supplementary Table 1.** The accuracy rate of miRdup and MatFind with different position deviation

| <b>Classifier</b> | <b>0nt</b> | <b>1nt</b> | <b>2nt</b> | <b>3nt</b> | <b>4nt</b> | <b>5nt</b> | <b>sum</b> |
|-------------------|------------|------------|------------|------------|------------|------------|------------|
| miRdup(%)         | 0.26       | 0.19       | 0.14       | 0.07       | 0.09       | 0.06       | 0.81       |
| MatFind(%)        | 0.33       | 0.24       | 0.14       | 0.09       | 0.09       | 0.03       | 1          |

**Supplementary Table 2.** The accuracy rate of MatureByes and MatFind with different position deviation

| <b>Classifier</b> | <b>0nt</b> | <b>1nt</b> | <b>2nt</b> | <b>3nt</b> | <b>4nt</b> | <b>5nt</b> | <b>sum</b> |
|-------------------|------------|------------|------------|------------|------------|------------|------------|
| MatureByes (%)    | 0.09       | 0.27       | 0.18       | 0.16       | 0.08       | 0.06       | 0.84       |
| MatFind(%)        | 0.33       | 0.24       | 0.14       | 0.09       | 0.09       | 0.03       | 1          |

**Supplementary Table 3.** The accuracy rate of miRPara and MatFind with different position deviation

| <b>Classifier</b> | <b>0nt</b> | <b>1nt</b> | <b>2nt</b> | <b>3nt</b> | <b>4nt</b> | <b>5nt</b> | <b>sum</b> |
|-------------------|------------|------------|------------|------------|------------|------------|------------|
| MiRPara (%)       | 0.04       | 0.03       | 0.11       | 0.06       | 0.11       | 0.02       | 0.37       |
| MatFind(%)        | 0.33       | 0.24       | 0.14       | 0.09       | 0.09       | 0.03       | 1          |
